# Supplementary material for: Fabrication and characterization of magnetic mesoporous nanoparticles for efficient determination and magnetic separation of sulfonamides in food samples
Source: Royal Society of Chemistry journal article supplement (doi:10.1039/d4ay00590b), 2024-01-01
Supplement: d4ay00590b1.pdf [file d4ay00590b1.pdf]

## Electronic Supplementary Information

### **Fabrication and characterization of magnetic mesoporous nanoparticles for efficient determination and magnetic separation of sulfonamides in food samples**

Mengmeng Zhang<sup>a</sup>, Wei Wang<sup>b,c</sup>, Lili Wu<sup>a</sup>, Zulei Zhang<sup>b,c\*</sup>, Hongmei Wang<sup>c</sup>, Liping Guo<sup>c</sup>, Ruobing Cheng<sup>b</sup>

<sup>a</sup>Comprehensive Technology and Service Center of Jiaxing Customs, Jiaxing 314001, China

<sup>b</sup>Analytical & Testing Center, Jiaxing University, Jiaxing 314001, China

<sup>c</sup>School of Biology and Chemical Engineering, Jiaxing University, Jiaxing 314001, China

\*Corresponding author

Email: jerry3641172@126.com, lei.li@mail.zjxu.edu.cn

Fax: +86-573-83646203; Tel: +86-573-83646203

## 1. Supporting data

Fig.S1 low-angle XRD spectra of  $\text{Fe}_3\text{O}_4@\text{SiO}_2@m\text{SiO}_2$

**Table S1.** The mean matrix effects of the MSPE method (2.0  $\mu\text{g/L}$  of SAs,  $n=3$ ).

| Analyst | Matrix effect   |                 |                 |
|---------|-----------------|-----------------|-----------------|
|         | Milk            | Pork            | egg             |
| SMZ     | 92.1 $\pm$ 3.2% | 91.8 $\pm$ 4.6% | 93.8 $\pm$ 3.8% |
| SIZ     | 89.9 $\pm$ 3.7% | 92.5 $\pm$ 5.5% | 93.4 $\pm$ 4.2% |
| SDZ     | 92.3 $\pm$ 3.2% | 91.3 $\pm$ 3.2% | 91.5 $\pm$ 2.8% |
| SMD     | 93.4 $\pm$ 3.0% | 89.1 $\pm$ 2.6% | 92.9 $\pm$ 3.8% |
